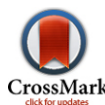

## Correction

# Correction: Lesions of the Lateral Habenula Increase Voluntary Ethanol Consumption and Operant Self-Administration, Block Yohimbine-Induced Reinstatement of Ethanol Seeking, and Attenuate Ethanol-Induced Conditioned Taste Aversion

## The PLOS ONE Staff

“Brain Institute” is incorrectly listed as an author for this article. The correct author list for this article is:

Andrew K. Haack, Chandni Sheth, Andrea L. Schwager, Michael S. Sinclair, Shashank Tandon, Sharif A. Taha

## Reference

1. Haack AK, Sheth C, Schwager A L, Sinclair MS, Tandon S, et al. (2014) Lesions of the Lateral Habenula Increase Voluntary Ethanol Consumption and Operant Self-Administration, Block Yohimbine-Induced Reinstatement of Ethanol Seeking, and Attenuate Ethanol-Induced Conditioned Taste Aversion. PLoS ONE 9(4): e92701. doi:10.1371/journal.pone.0092701

---

**Citation:** The PLOS ONE Staff (2014) Correction: Lesions of the Lateral Habenula Increase Voluntary Ethanol Consumption and Operant Self-Administration, Block Yohimbine-Induced Reinstatement of Ethanol Seeking, and Attenuate Ethanol-Induced Conditioned Taste Aversion. PLoS ONE 9(5): e98732. doi:10.1371/journal.pone.0098732

**Published:** May 23, 2014

**Copyright:** © 2014 The PLOS ONE Staff. This is an open-access article distributed under the terms of the Creative Commons Attribution License, which permits unrestricted use, distribution, and reproduction in any medium, provided the original author and source are credited.
